# Supplementary material
Source: PubMed Central journal article supplement (PMC2638058)
Supplement: NIHMS87847-supplement-1_si_001.pdf [file NIHMS87847-supplement-1_si_001.pdf]

**SUPPORTING INFORMATION**  
**Liu et al. Biochemistry 2008**

**Table SI\_1**

Fe<sub>a3</sub> - Cu<sub>B</sub> distance comparisons among different cytochrome *c* oxidases

| PDB code<br>Oxidized <sup>a</sup><br>enzyme     | Fe <sub>a3</sub> - Cu <sub>B</sub><br>(Å) <sup>b</sup> | PDB code<br>Reduced <sup>c,d</sup><br>enzyme                                     | Fe <sub>a3</sub> - Cu <sub>B</sub><br>(Å) | Δ (red - ox)<br>(Fe <sub>a3</sub> - Cu <sub>B</sub> ) |
|-------------------------------------------------|--------------------------------------------------------|----------------------------------------------------------------------------------|-------------------------------------------|-------------------------------------------------------|
| 1V54<br>Bovine<br>Fully<br>oxidized             | 5.0                                                    | 1V55<br>Bovine<br>Reduced crystal                                                | 5.1                                       | + 0.1                                                 |
| 1OCC<br>Fully<br>oxidized                       | 4.9                                                    | 1OCR<br>Bovine<br>Reduced crystal                                                | 5.2                                       | + 0.3                                                 |
| 2EIL<br>Bovine<br>Fully<br>oxidized             | 4.8                                                    | 2EIK<br>Bovine<br>Reduced crystal                                                | 5.1                                       | + 0.3                                                 |
| 2EIN<br>Bovine<br>Fully<br>oxidized             | 4.6                                                    | 2EIM<br>Bovine<br>Reduced crystal                                                | 4.1                                       | - 0.5<br>(?)                                          |
| 1QLE<br><i>Pd aa</i> <sub>3</sub><br>oxidized   | 5.5                                                    | N/A                                                                              | N/A                                       |                                                       |
| 1XME<br><i>Tt ba</i> <sub>3</sub><br>oxidized   | 4.4                                                    |                                                                                  |                                           |                                                       |
| 1EHK<br><i>Tt ba</i> <sub>3</sub><br>oxidized   | 4.4                                                    |                                                                                  |                                           |                                                       |
| 3EH4<br><i>Tt ba</i> <sub>3</sub><br>This work. | 4.7                                                    | 3EH3 <sup>c</sup> & 3EH5 <sup>d</sup><br><i>Tt ba</i> <sub>3</sub><br>This work. | 5.1 & 5.0                                 | + 0.4 & 0.3                                           |

<sup>a</sup>Most likely represents the X-ray radiation reduced enzyme. <sup>b</sup>Distances reported to the first decimal place. <sup>c</sup>Treatment of oxidized crystals with dithionite. <sup>d</sup>Crystal prepared from reduced enzyme.
